# Supplementary material
Source: publisher figshare collection journal article supplement (https://frontiersin.figshare.com/ndownloader/files/34140075)
Supplement: Supplementary file [file 34140075]

**Supplementary Table S3. Pathophysiological mechanism, clinical phenotypes, and therapeutic targets in different neurons with *MECP2* deletions**

| Neuron types                                    | Pathophysiological mechanism                                                           | Clinical phenotypes                                                                                                        | Therapeutic targets                                                            |
|-------------------------------------------------|----------------------------------------------------------------------------------------|----------------------------------------------------------------------------------------------------------------------------|--------------------------------------------------------------------------------|
| <b>Dopaminergic neurons</b>                     | Affect dopaminergic nervous system                                                     | Motor disorder: stereotyped hand-wringing, progressive rigidity, dyskinesia, and dystonia                                  | Dopaminergic agents: levodopa and benserazide                                  |
| <b>Cholinergic neurons</b>                      |                                                                                        |                                                                                                                            |                                                                                |
| The basal forebrain-hippocampus                 | Affect cholinergic neural circuit                                                      | Anxiety/depression-related behavioral changes, abnormal social skills, susceptibility to epilepsy, and loss of fear memory | Cholinergic Drugs: Choline                                                     |
| The striatum                                    | Up-regulation of $\alpha 2$ -GABA receptor                                             |                                                                                                                            |                                                                                |
| <b>GABAergic neurons</b>                        | GABAergic signaling dysfunction                                                        | Repetitive behaviors, impaired motor coordination, increased social interest, and altered sensorimotor gating and arousal  | GABAergic modulators: GABA <sub>A</sub> antagonist<br>GABA reuptake inhibitors |
| Brain stem / basal forebrain                    |                                                                                        |                                                                                                                            |                                                                                |
| The hippocampus                                 |                                                                                        |                                                                                                                            |                                                                                |
| <b>Forebrain excitatory neurons</b>             | Down-regulation GABA receptor                                                          | Motor disorder, increased anxiety-like behaviors and impaired fear conditioning and social behavior                        | GABAergic modulators                                                           |
| <b>Glutamatergic neurons</b>                    | Glutamatergic signaling dysfunction leads to repetitive glutamate transients           | The motor performance, clasping behavior and fear-conditioning defects, sleep dysfunction, susceptibility to epilepsy      | Glutamatergic modulators: NMDA receptor antagonist<br>mGlu5 modulator          |
| The frontal cortices                            |                                                                                        |                                                                                                                            |                                                                                |
| The hippocampus                                 |                                                                                        |                                                                                                                            |                                                                                |
| <b>BDNF expression neurons</b>                  | BDNF-TrkB signaling dysfunction: Decrease in BDNF and TrkB receptor protein levels     | Motor deficits, breathing dysfunction, heart rate disorder, neural morphology abnormality, life span influence             | Growth factor therapy<br>BDNF mimetics or boosters                             |
| The cerebral cortex, hippocampus and cerebellum |                                                                                        |                                                                                                                            |                                                                                |
| <b>HDAC expression neurons</b>                  | HDAC overexpression and decrease in acetylated tubulin levels<br>Affect BDNF signaling | Motor deficits, breathing dysfunction, heart rate disorder, neural morphology abnormality, life span influence             | HDAC inhibitors                                                                |
| <b>Serotonergic neurons</b>                     | Down-regulation serotonin receptor                                                     | Increased aggression, irregular breathing and apnoea                                                                       | Serotonin receptor agonist<br>Dopamine D <sub>2</sub> partial agonist          |
| <b>Catecholaminergic neurons</b>                | Norepinephrine system dysfunction                                                      | Impairment of cognitive and attention, anxiety, psychosis, motor disorder, breathing                                       | Adrenergic receptor agonist                                                    |
| Neurons in the locus coeruleus                  |                                                                                        |                                                                                                                            |                                                                                |

|                                                           |                                                                                       |                                                                                            |                                               |
|-----------------------------------------------------------|---------------------------------------------------------------------------------------|--------------------------------------------------------------------------------------------|-----------------------------------------------|
| The brain stem                                            |                                                                                       | dysfunction, and social abnormalities                                                      |                                               |
| <b><i>Sim1</i>-expressing neurons in the hypothalamus</b> | Disrupts MC4R signaling pathway<br>Decreased expression of <i>Crh</i> and BDNF in PVN | Alterations in feeding behavior, aggression and stress response                            | Adrenergic drugs<br>BDNF mimetics or boosters |
| <b>Somatosensory neurons in the barrel cortex</b>         | Impaired E/I balance                                                                  | Leads to anxiety, social interaction abnormalities, and tactile sensory and motor problems | Antidepressants                               |

BDNF, brain-derived neurotrophic factor; *Crh*, Corticotropin-Releasing Hormone; E/I, excitation/inhibition; GABA,  $\gamma$ -aminobutyric acid; HDAC, histone deacetylase; *MECP2*, methyl-CpG binding protein gene 2; mGlu5, metabotropic glutamate 5 receptor; NMDA, *N*-methyl-D-aspartate; PVN, paraventricular nucleus; TrkB, tyrosine receptor kinase B.
